# Supplementary material for: Coinfection with Leishmania major and Staphylococcus aureus enhances the pathologic responses to both microbes through a pathway involving IL-17A
Source: PLOS journal article supplement (doi:10.1371/journal.pntd.0007247), 2019-05-20
Supplement: S8 (10.1371/journal.pntd.0007247.s008) [file journal.pntd.0007247.s008]

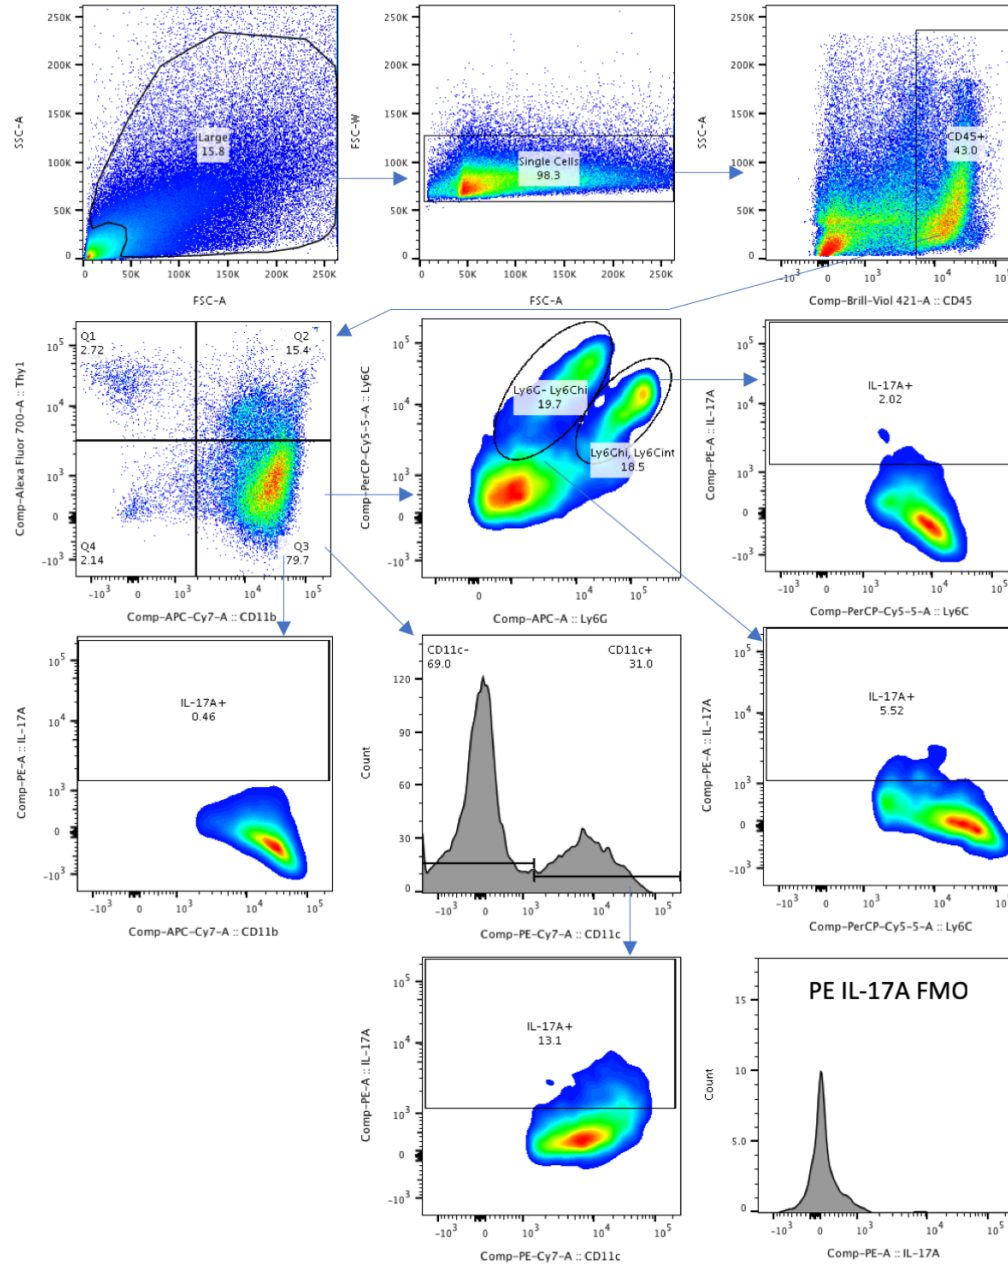

**S8 Figure. Gating strategy for myeloid surface staining and intracellular cytokine stains.** Cells were gated by forward scatter (FSC) x side scatter (SSC) followed by FSC x FSC-Width to obtain single cells. CD45 was used as a marker of hematopoietic cells, followed by Thy1.2 to exclude T cells, and CD11b as a marker expressed by myeloid cells. Dendritic cells (DC) were defined as CD45<sup>+</sup> CD11b<sup>+</sup> CD11c<sup>+</sup> cells. CD11b<sup>+</sup> were further delineated by expression of Ly6G and Ly6C. Neutrophils (PMN) were defined as CD45<sup>+</sup> CD11b<sup>+</sup> Ly6G<sup>hi</sup> Ly6C<sup>int</sup>, and inflammatory monocytes (MN) were defined as CD45<sup>+</sup> CD11b<sup>+</sup> Ly6G<sup>-</sup> Ly6C<sup>hi</sup>. Fluorescence minus one (FMO) controls were used to gate on cells positive for expression of IL-17A.
